# Supplementary material for: Coastal microbial quality of surface sediments in different environments along the Italian coast
Source: Royal Society of Chemistry journal article supplement (doi:10.1039/c4em00225c), 2014-06-09
Supplement: c4em00225c1.pdf [file c4em00225c1.pdf]

### Supplementary Data

**Table S1:** Non parametric statistics of Total coliform, Faecal coliform and *Escherichia coli* referred to each environmental type/subset.

| Environmental type/subset | Total coliform |        |        | Faecal coliform |       |       | <i>Escherichia coli</i> |       |     |
|---------------------------|----------------|--------|--------|-----------------|-------|-------|-------------------------|-------|-----|
|                           | 1              | 2+3    | 4      | 1+4             | 2     | 3     | 1                       | 3     | 4   |
| N                         | 1139           | 434    | 370    | 1900            | 201   | 240   | 176                     | 472   | 43  |
| Median                    | 9              | 0      | 12     | 0               | 0     | 0     | 10                      | 0     | 0   |
| 75 <sup>th</sup> perc.    | 90             | 9      | 178    | 9               | 0     | 0     | 98                      | 1     | 1   |
| 85 <sup>th</sup> perc.    | 246            | 20     | 700    | 25              | 0     | 2     | 480                     | 2     | 2   |
| 90 <sup>th</sup> perc.    | 462            | 34     | 1273   | 68              | 0     | 10    | 840                     | 3     | 2   |
| 95 <sup>th</sup> perc.    | 918            | 237    | 3172   | 185             | 9     | 63    | 3050                    | 8     | 5   |
| 99 <sup>th</sup> perc.    | 2216           | 5504   | 24160  | 1088            | 60    | 10623 | 13517                   | 18    | 10  |
| Max                       | 176667         | 100678 | 171036 | 86000           | 1300  | 17509 | 54421                   | 105   | 10  |
| Skewness                  | 33.2           | 18.2   | 11.2   | 39.9            | 13.3  | 8.0   | 9.9                     | 11.7  | 3.1 |
| Kurtosis                  | 1115.7         | 352.8  | 135.9  | 1670.5          | 181.5 | 67.3  | 111.8                   | 157.2 | 9.8 |

1 = marine ports of 1<sup>st</sup> and 2<sup>nd</sup> Class; 2 = marine ports of 3<sup>rd</sup> Class; 3 = Coastal marine areas; 4 = Port channel in brackish environments.

**Table S2:** Non parametric statistics of enterococci and SRCs referred to each environmental type/subset.

| Environmental type/subset | Enterococci |       |       |       | SRCs    |      |      |        |
|---------------------------|-------------|-------|-------|-------|---------|------|------|--------|
|                           | 1           | 2     | 3     | 4     | 1       | 2    | 3    | 4      |
| N                         | 1427        | 243   | 312   | 816   | 1493    | 227  | 251  | 743    |
| Median                    | 4           | 0     | 0     | 0     | 31      | 0    | 6    | 129    |
| 75 <sup>th</sup> perc.    | 35          | 0     | 3     | 5     | 717     | 12   | 28   | 595    |
| 85 <sup>th</sup> perc.    | 106         | 2     | 9     | 20    | 3191    | 48   | 66   | 1390   |
| 90 <sup>th</sup> perc.    | 214         | 4     | 24    | 48    | 13056   | 121  | 114  | 2697   |
| 95 <sup>th</sup> perc.    | 652         | 10    | 49    | 190   | 59675   | 396  | 204  | 7449   |
| 99 <sup>th</sup> perc.    | 3041        | 576   | 1719  | 2356  | 200990  | 1053 | 1374 | 27934  |
| Max                       | 9410        | 2880  | 6246  | 21918 | 1422376 | 1333 | 3320 | 110000 |
| Skewness                  | 8.6         | 10.3  | 9.9   | 15.6  | 13.8    | 4.3  | 7.0  | 9.6    |
| Kurtosis                  | 89.1        | 107.4 | 106.1 | 276.7 | 223.4   | 18.7 | 61.1 | 105.9  |

1 = marine ports of 1<sup>st</sup> and 2<sup>nd</sup> Class; 2 = marine ports of 3<sup>rd</sup> Class; 3 = Coastal marine areas; 4 = Port channel in brackish environments.

**Table S3:** Non parametric statistics of TBC (at 22°C and 37°C) and fungi referred to each environmental type/subset.

| Environmental type/subset | TBC 22°C |      |      | TBC 37°C |      |      | Fungi |      |      |       |
|---------------------------|----------|------|------|----------|------|------|-------|------|------|-------|
|                           | 1        | 2+4  | 3    | 1        | 2+4  | 3    | 1     | 2    | 3    | 4     |
| N                         | 365      | 12   | 55   | 393      | 22   | 55   | 137   | 95   | 192  | 174   |
| Median                    | 177785   | 940  | 90   | 148437   | 1095 | 160  | 68    | 0    | 0    | 20    |
| 75 <sup>th</sup> perc.    | 961538   | 1680 | 140  | 938337   | 2015 | 304  | 194   | 0    | 27   | 85    |
| 85 <sup>th</sup> perc.    | 1875469  | 2220 | 240  | 1560776  | 2451 | 380  | 412   | 3    | 64   | 156   |
| 90 <sup>th</sup> perc.    | 2604609  | 2880 | 272  | 2225812  | 3036 | 576  | 662   | 18   | 124  | 202   |
| 95 <sup>th</sup> perc.    | 4625913  | 3180 | 469  | 3347368  | 3461 | 832  | 1675  | 39   | 268  | 480   |
| 99 <sup>th</sup> perc.    | 17510724 | 3356 | 1881 | 7038779  | 5186 | 2417 | 3822  | 289  | 2561 | 5003  |
| Max                       | 65615141 | 3400 | 3080 | 15548281 | 5640 | 4020 | 75178 | 644  | 3323 | 16842 |
| Skewness                  | 10.9     | 1.0  | 6.2  | 5.2      | 1.6  | 5.8  | 11.5  | 7.9  | 7.0  | 10.1  |
| Kurtosis                  | 152.5    | 0.0  | 41.8 | 37.9     | 3.1  | 38.3 | 134.2 | 66.7 | 51.8 | 113.1 |

1 = marine ports of 1<sup>st</sup> and 2<sup>nd</sup> Class; 2 = marine ports of 3<sup>rd</sup> Class; 3 = Coastal marine areas; 4 = Port channel in brackish environments.

**Table S4:** Percentiles of the main distribution of raw data below which the distribution of each environment type/subset is included.

|                         |               |                     |                     |                     |                    |
|-------------------------|---------------|---------------------|---------------------|---------------------|--------------------|
| Total coliform          | Environ. type | 1                   | 2+3                 | 4                   |                    |
|                         | Percentile    | < 98 <sup>th</sup>  | < 95 <sup>th</sup>  | < 98 <sup>th</sup>  |                    |
| Faecal coliform         | Environ. type | 1+4                 | 2                   | 3                   |                    |
|                         | Percentile    | < 94 <sup>th</sup>  | < 95 <sup>th</sup>  | < 95 <sup>th</sup>  |                    |
| <i>Escherichia coli</i> | Environ. type | 1                   | 2                   | 3                   |                    |
|                         | Percentile    | < 96 <sup>th</sup>  | < 96 <sup>th</sup>  | < 94 <sup>th</sup>  |                    |
| Enterococci             | Environ. type | 1                   | 2                   | 3                   | 4                  |
|                         | Percentile    | < 95 <sup>th</sup>  | < 96 <sup>th</sup>  | < 96 <sup>th</sup>  | < 94 <sup>th</sup> |
| SRCs                    | Environ. type | 1                   | 2                   | 3                   | 4                  |
|                         | Percentile    | < 100 <sup>th</sup> | < 95 <sup>th</sup>  | < 25 <sup>th</sup>  | < 98 <sup>th</sup> |
| TBC 22°                 | Environ. type | 1                   | 2+4                 | 3                   |                    |
|                         | Percentile    | < 100 <sup>th</sup> | < 100 <sup>th</sup> | < 99 <sup>th</sup>  |                    |
| TBC 37°                 | Environ. type | 1                   | 2+4                 | 3                   |                    |
|                         | Percentile    | < 100 <sup>th</sup> | < 100 <sup>th</sup> | < 100 <sup>th</sup> |                    |
| Fungi                   | Environ. type | 1                   | 2                   | 3                   | 4                  |
|                         | Percentile    | < 100 <sup>th</sup> | < 53 <sup>th</sup>  | < 97 <sup>th</sup>  | < 98 <sup>th</sup> |

1 = marine ports of 1<sup>st</sup> and 2<sup>nd</sup> Class; 2 = marine ports of 3<sup>rd</sup> Class; 3 = Coastal marine areas; 4 = Port channel in brackish environments.
